# Supplementary material
Source: PubMed Central journal article supplement (PMC10698618)
Supplement: jama-e2319918-s005.pdf [file jama-e2319918-s005.pdf]

## Supplemental Online Content: Nonauthor Collaborators

\*First name, last name, and suffix (if applicable) are required and will appear in PubMed.

| <b>*Group Name(s): ORIENT-16 Investigators</b> |                   |                              |                         |                                                                                      |                                                 |                                                                |                                                                                                   |
|------------------------------------------------|-------------------|------------------------------|-------------------------|--------------------------------------------------------------------------------------|-------------------------------------------------|----------------------------------------------------------------|---------------------------------------------------------------------------------------------------|
| <b>*First Name and Middle Initial(s)</b>       | <b>*Last Name</b> | <b>*Suffix (eg, Jr, III)</b> | <b>Academic Degrees</b> | <b>Institution</b>                                                                   | <b>Location (city, state/province, country)</b> | <b>Role or Contribution, eg, chair, principal investigator</b> | <b>Group (if more than 1 Group listed in the byline) and/or Subgroup (eg, Steering Committee)</b> |
| Hongmei                                        | Sun               |                              | Bachelor of             | Jiamusi Cancer Hospital                                                              | Jiamusi, Heilongjiang, China                    | Investigator                                                   |                                                                                                   |
| Qi                                             | Wang              |                              | Bachelor of             | Changzhou First People's Hospital                                                    | Changzhou, Jiangsu, China                       | Investigator                                                   |                                                                                                   |
| Junhe                                          | Li                |                              | Doctor of M             | First Affiliated Hospital of Nanchang Un                                             | Nanchang, Jiangxi, China                        | Investigator                                                   |                                                                                                   |
| Da                                             | Jiang             |                              | Master of Medicine      | The Fourth Hospital of Hebei Medical University                                      | Shijiazhuang, Hebei, China                      | Investigator                                                   |                                                                                                   |
| Weijian                                        | Guo               |                              | Doctor of M             | Fudan University Shanghai Cancer Center                                              | Shanghai, China                                 | Investigator                                                   |                                                                                                   |
| Jieer                                          | Ying              |                              | Doctor of M             | Zhejiang Cancer Hospital                                                             | Hangzhou, Zhejiang, China                       | Investigator                                                   |                                                                                                   |
| Shubin                                         | Wang              |                              | Doctor of M             | Peking University Shenzhen Hospital                                                  | Shenzhen, Guangdong, China                      | Investigator                                                   |                                                                                                   |
| Aimin                                          | Zang              |                              | Doctor of M             | Affiliated Hospital Of Hebei University                                              | Baoding, Hebei, China                           | Investigator                                                   |                                                                                                   |
| Shirong                                        | Cai               |                              | Doctor of M             | The First Affiliated Hospital of Sun Yat-                                            | Guangzhou, Guangdong, Chir                      | Investigator                                                   |                                                                                                   |
| Chunhong                                       | Hu                |                              | Doctor of M             | Xiangya Second Hospital of Central South University                                  | Changsha, Hunan, China                          | Investigator                                                   |                                                                                                   |
| Tao                                            | Zhang             |                              | Doctor of M             | Union hospital Tongji medical college, Huazhong university of science and technology | Wuhan, Hubei, China                             | Investigator                                                   |                                                                                                   |
| Min                                            | Tao               |                              | Doctor of M             | The First Affiliated Hospital of Soochow University                                  | Suzhou, Jiangsu, China                          | Investigator                                                   |                                                                                                   |
| Jun                                            | Liang             |                              | Doctor of M             | Peking University International Hospital                                             | Beijing, China                                  | Investigator                                                   |                                                                                                   |
| Qinsheng                                       | Mao               |                              | Doctor of M             | Affiliated Hospital of Nantong University                                            | Nantong, Jiangsu, China                         | Investigator                                                   |                                                                                                   |
| Minghui                                        | Zhang             |                              | Master of Medicine      | Chifeng Municipal Hospital                                                           | Chifeng, Inner Mongolia, Chi                    | Investigator                                                   |                                                                                                   |
| Rui                                            | Mao               |                              | Master of Medicine      | The First Affiliated Hospital of Xinjiang Medical University                         | Urumqi, Xinjiang, China                         | Investigator                                                   |                                                                                                   |
| Hui                                            | Yang              |                              | Bachelor of             | Suzhou Municipal Hospital                                                            | Suzhou, Jiangsu, China                          | Investigator                                                   |                                                                                                   |
| Hongyu                                         | Zhang             |                              | Doctor of M             | The Fifth Affiliated Hospital of Zhongshan University                                | Zhuhai, Guangdong, China                        | Investigator                                                   |                                                                                                   |
| Lin                                            | Shen              |                              | Doctor of M             | Beijing Cancer Hospital                                                              | Beijing, China                                  | Investigator                                                   |                                                                                                   |
| Jin                                            | Lu                |                              | Master of M             | Sichuan Cancer Hospital                                                              | Chengdu, Sichuan, China                         | Investigator                                                   |                                                                                                   |
| Wenxin                                         | Li                |                              | Doctor of M             | Inner Mongolia People's Hospital                                                     | Hohhot City, Inner Mongolia,                    | Investigator                                                   |                                                                                                   |

## Supplemental Online Content: Nonauthor Collaborators

\*First name, last name, and suffix (if applicable) are required and will appear in PubMed.

| *First Name and Middle Initial(s) | *Last Name | *Suffix (eg, Jr, III) | Academic Degrees | Institution                                                 | Location (city, state/province, country) | Role or Contribution, eg, chair, principal investigator | Group (if more than 1 Group listed in the byline) and/or Subgroup (eg, Steering Committee) |
|-----------------------------------|------------|-----------------------|------------------|-------------------------------------------------------------|------------------------------------------|---------------------------------------------------------|--------------------------------------------------------------------------------------------|
| Yamin                             | Chen       |                       | Doctor of M      | The First Affiliated Hospital Of Dalian Medical University  | Dalian, Liaoning, China                  | Investigator                                            |                                                                                            |
| Lei                               | Chen       |                       | Bachelor of      | Cancer Hospital of Shantou University Medical College       | Shantou, Guangdong, China                | Investigator                                            |                                                                                            |
| Zhixiang                          | Zhuang     |                       | Master of M      | The Second Affiliated Hospital of Soochow University        | Suzhou, Jiangsu, China                   | Investigator                                            |                                                                                            |
| Chunmei                           | Bai        |                       | Doctor of M      | Peking Union Medical College Hospital                       | Beijing, China                           | Investigator                                            |                                                                                            |
| Heli                              | Liu        |                       | Doctor of M      | Xiangya Hospital of Central South University                | Changsha, Hunan, China                   | Investigator                                            |                                                                                            |
| Jingtang                          | Chen       |                       | Bachelor of      | Dongguan People's Hospital                                  | Dongguan, Guangdong, China               | Investigator                                            |                                                                                            |
| Wangjun                           | Liao       |                       | Doctor of M      | Nanfang Hospital                                            | Guangzhou, Guangdong, China              | Investigator                                            |                                                                                            |
| Meng                              | Qiu        |                       | Doctor of M      | West China Hospital of Sichuan University                   | Chengdu, Sichuan, China                  | Investigator                                            |                                                                                            |
| Rongfeng                          | Song       |                       | Master of M      | Jiangxi Cancer Hospital                                     | Nanchang, Jiangxi, China                 | Investigator                                            |                                                                                            |
| Man                               | Li         |                       | Doctor of M      | The Second Hospital of Dalian Medical University            | Dalian, Liaoning, China                  | Investigator                                            |                                                                                            |
| Suying                            | Qian       |                       | Master of M      | Hwa Mei Hospital, University of Chinese                     | Ningbo, Zhejiang, China                  | Investigator                                            |                                                                                            |
| Yunpeng                           | Liu        |                       | Doctor of M      | The First Hospital of China Medical University              | Shenyang, Liaoning, China                | Investigator                                            |                                                                                            |
| Jiang                             | Liu        |                       | Bachelor of      | Xinjiang Uiger Municipal People's Hosp                      | Urumqi, Xinjiang, China                  | Investigator                                            |                                                                                            |
| Dong                              | Wang       |                       | Doctor of M      | Army Medical Center of PLA                                  | Chongqing, China                         | Investigator                                            |                                                                                            |
| Xianli                            | Yin        |                       | Bachelor of      | Hunan Provincial Tumor Hospital                             | Changsha, Hunan, China                   | Investigator                                            |                                                                                            |
| Zhiming                           | Huang      |                       | Bachelor of      | The First Affiliated Hospital of Wenzhou Medical University | Wenzhou, Zhejiang, China                 | Investigator                                            |                                                                                            |
